# Supplementary material for: Long interspersed nuclear element-1 expression and retrotransposition in prostate cancer cells
Source: PubMed Central journal article supplement (PMC5753491; doi:10.1186/s13100-017-0106-z), 2018-01-03

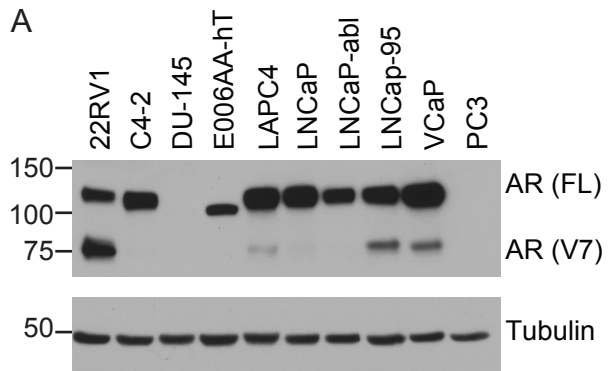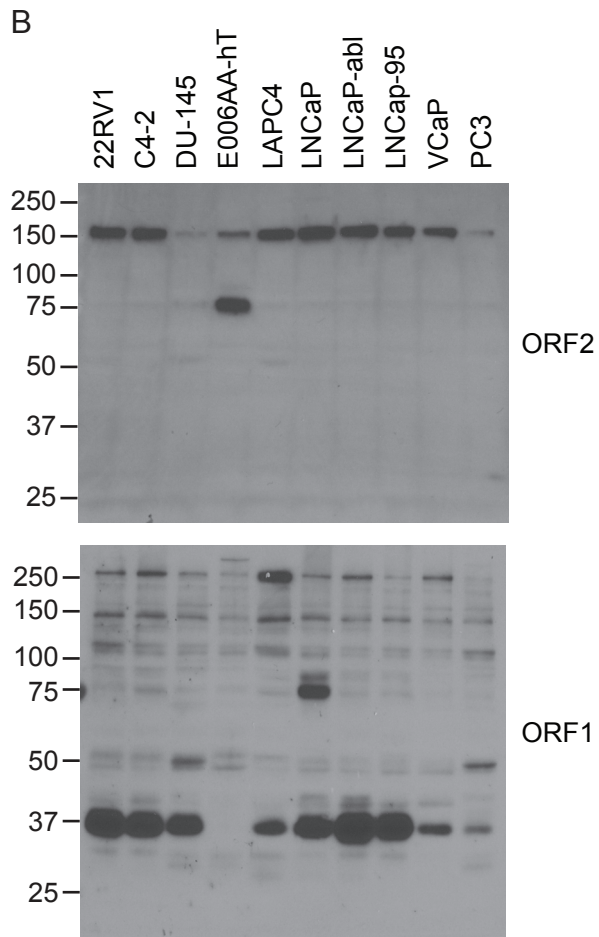

Supplement: 13100_2017_106_MOESM1_ESM.pdf [file 13100_2017_106_MOESM1_ESM.pdf]
